# Supplementary material for: Linear ABC amphiphilic triblock copolymers for complexation and protection of dsRNA
Source: Royal Society of Chemistry journal article supplement (doi:10.1039/d2py00914e), 2022-01-01
Supplement: d2py00914e1.pdf [file d2py00914e1.pdf]

# Supplementary Information for ‘Linear ABC Amphiphilic Triblock Copolymers for Complexation and Protection of dsRNA’

*Charlotte E. Pugsley<sup>1,2</sup>, R. Elwyn Isaac<sup>2</sup>, Nicholas J. Warren<sup>1</sup> and Olivier J. Cayre<sup>1,\*</sup>*

<sup>1</sup>School of Chemical and Process Engineering, University of Leeds, Leeds, LS2 9JT, United Kingdom

<sup>2</sup>School of Biology, Faculty of Biological Sciences, University of Leeds, Leeds, LS2 9JT, United Kingdom

| Solvent          | Monomer/Polymer |          |     |       |     |           |       |
|------------------|-----------------|----------|-----|-------|-----|-----------|-------|
|                  | QDMAEMA         | PQDMAEMA | TBA | Q-b-B | DMA | Q-b-B-b-D | Q-b-D |
| H <sub>2</sub> O | y               | y        | n   | n     | y   | n         | y     |
| Ethanol          | y               | y        | y   | y     | y   | y         |       |
| Acetone          | y*              | n        | y   | n     |     |           | n     |
| Hexane           | n               | n        | n   | n     |     |           |       |
| Methanol         |                 | y        | y   | y     |     |           |       |
| IPA              |                 | n        | y   |       |     |           |       |
| Toluene          |                 | n        | y/n |       |     |           |       |
| DCM              |                 | n        | y   |       |     |           |       |
| Diethyl ether    |                 |          | y   | n     |     |           |       |

Table S1. Solubility testing of monomers and polymers, to determine optimal solvent choice for each stage of the polymerisation. \* = only with added ethanol.

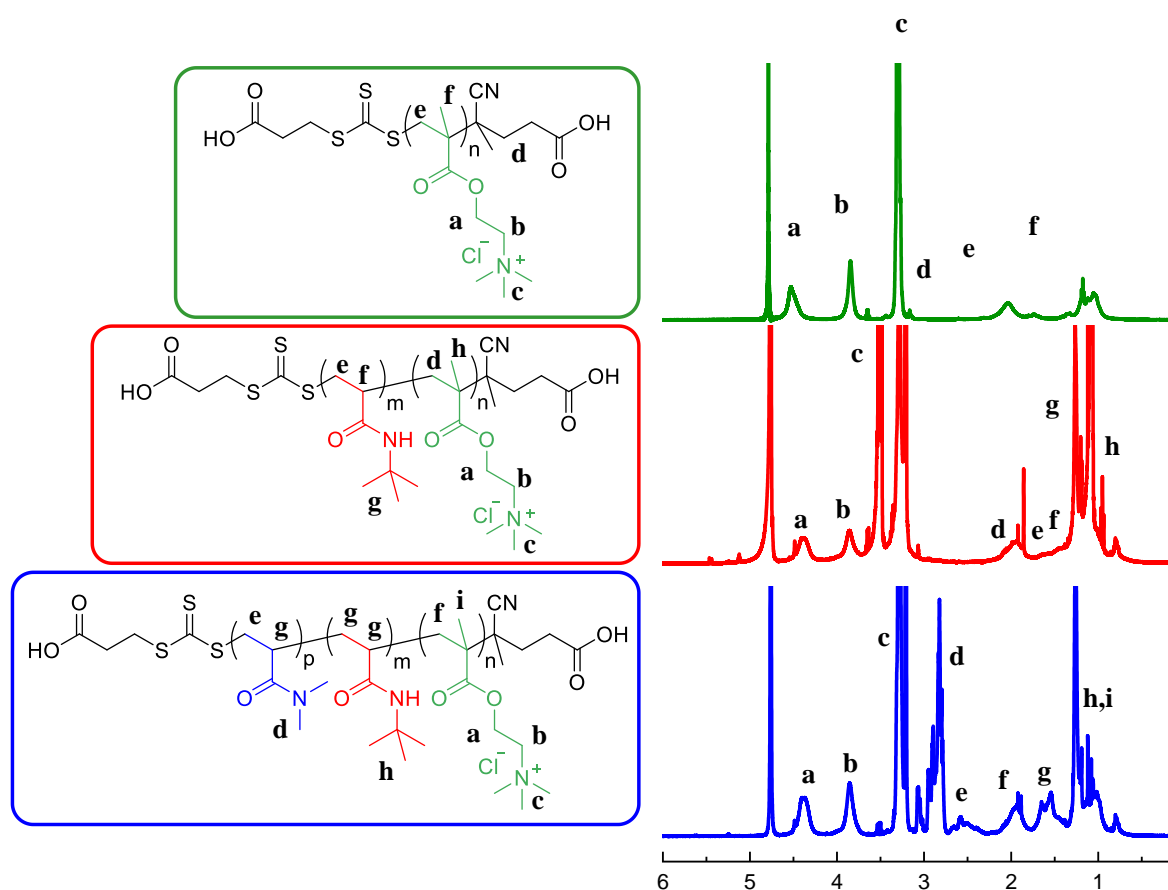

Figure S1. <sup>1</sup>H NMR (400 MHz) spectra of the homopolymer Q<sub>100</sub>, the diblock copolymer Q<sub>100-b-B</sub><sub>25</sub> and the triblock copolymer Q<sub>100-b-B</sub><sub>25-b-D</sub><sub>55</sub>, respectively.

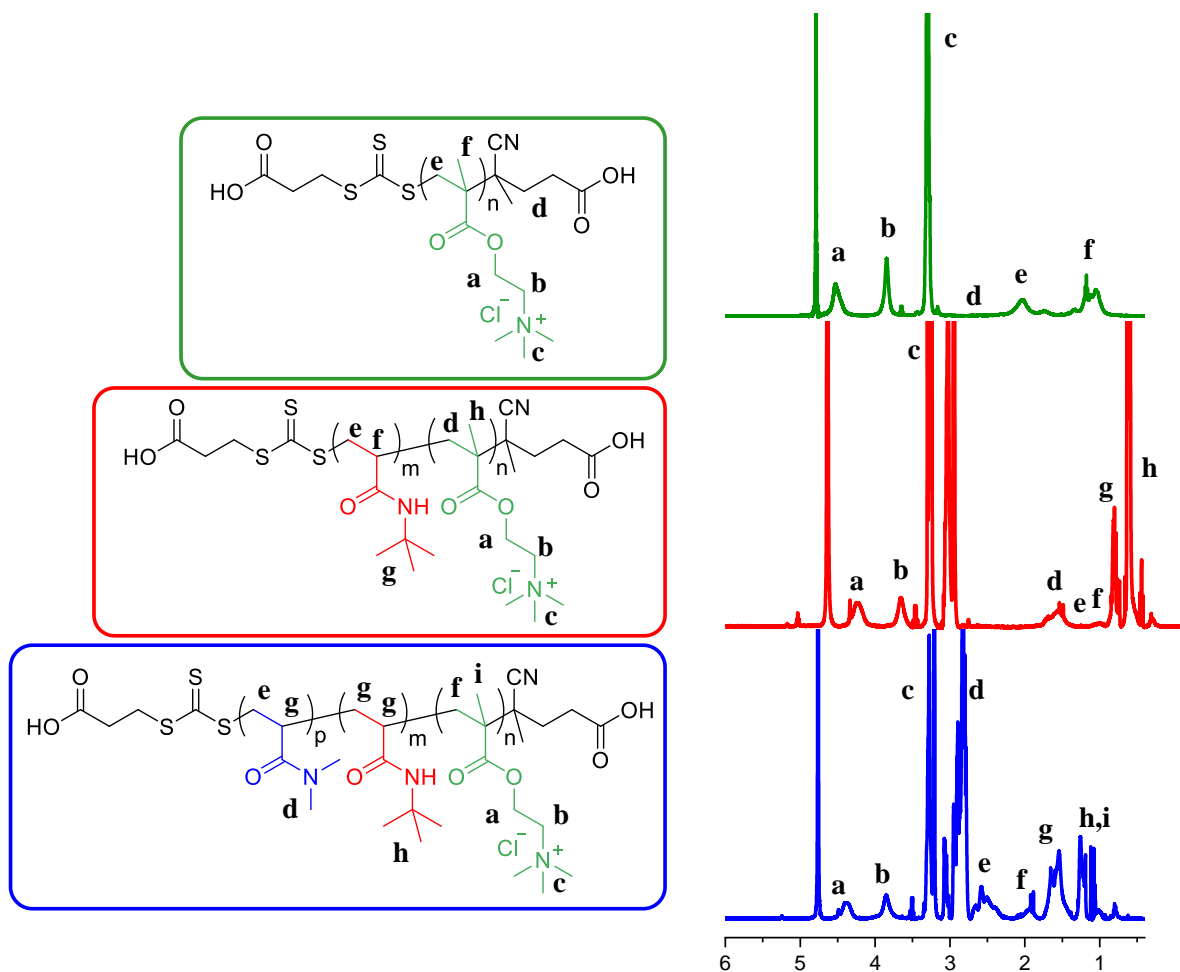

Figure S2.  $^1\text{H}$  NMR (400 MHz) spectra of the homopolymer  $\text{Q}_{100}$ , the diblock copolymer  $\text{Q}_{100}\text{-}b\text{-}B_{17}$  and the triblock copolymer  $\text{Q}_{100}\text{-}b\text{-}B_{17}\text{-}b\text{-}D_{212}$ , respectively.

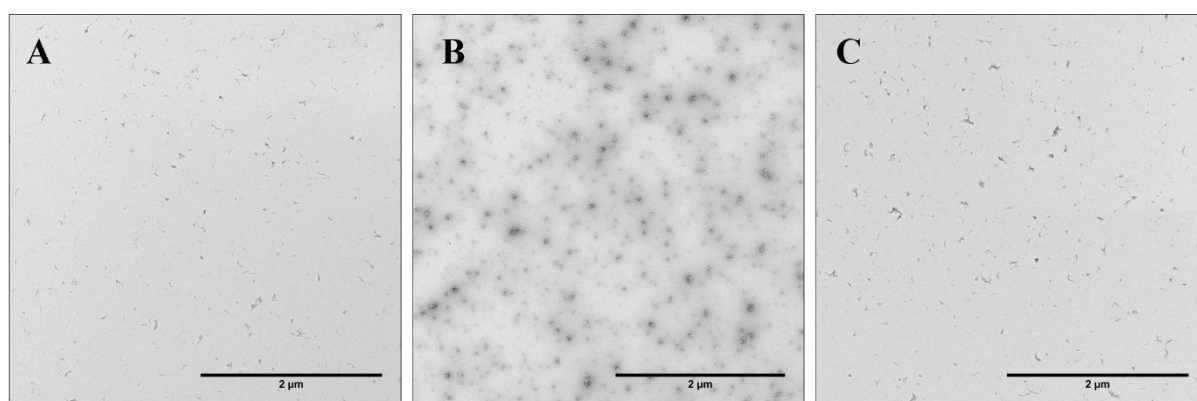

Figure S3. Representative TEM images obtained for the 3 triblock copolymers when complexed with dsRNA (A)  $\text{Q}_{100}\text{-}b\text{-}B_{17}\text{-}b\text{-}D_{212}$ , (B)  $\text{Q}_{100}\text{-}b\text{-}B_{25}\text{-}b\text{-}D_{55}$  and (C)  $\text{Q}_{100}\text{-}b\text{-}B_{44}\text{-}b\text{-}D_{99}$ . Solutions were formulated at  $1\text{ g L}^{-1}$ , with  $5\ \mu\text{L}$  deposited onto 400-mesh carbon-coated copper grids. Grids were then washed with Milli-Q water and stained with 1% uranyl acetate.

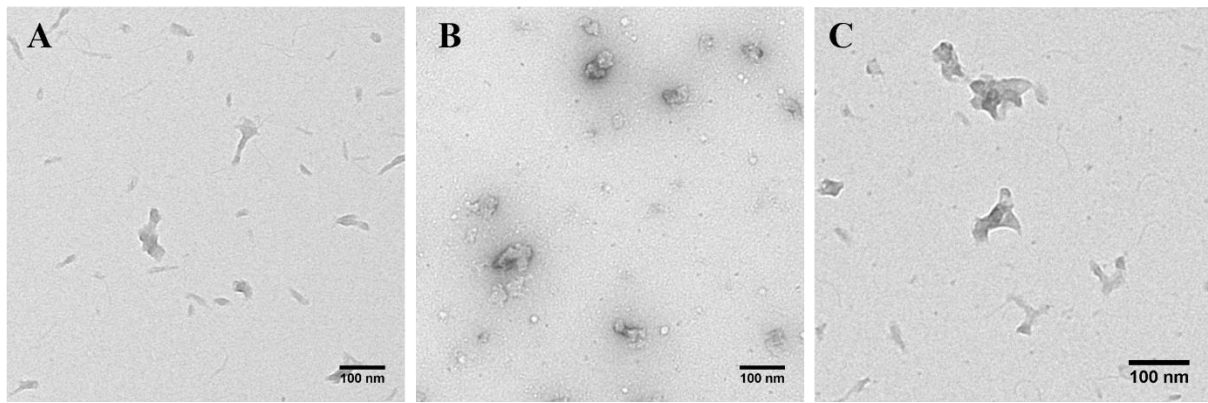

Figure S4. Representative TEM images (at higher magnification) obtained for the 3 triblock copolymers when complexed with dsRNA (A)  $Q_{100}\text{-}b\text{-}B_{17}\text{-}b\text{-}D_{212}$ , (B)  $Q_{100}\text{-}b\text{-}B_{25}\text{-}b\text{-}D_{55}$  and (C)  $Q_{100}\text{-}b\text{-}B_{44}\text{-}b\text{-}D_{99}$ . Solutions were formulated at  $1\text{ g L}^{-1}$ , with  $5\text{ }\mu\text{L}$  deposited onto 400-mesh carbon-coated copper grids. Grids were then washed with Milli-Q water and stained with 1% uranyl acetate.

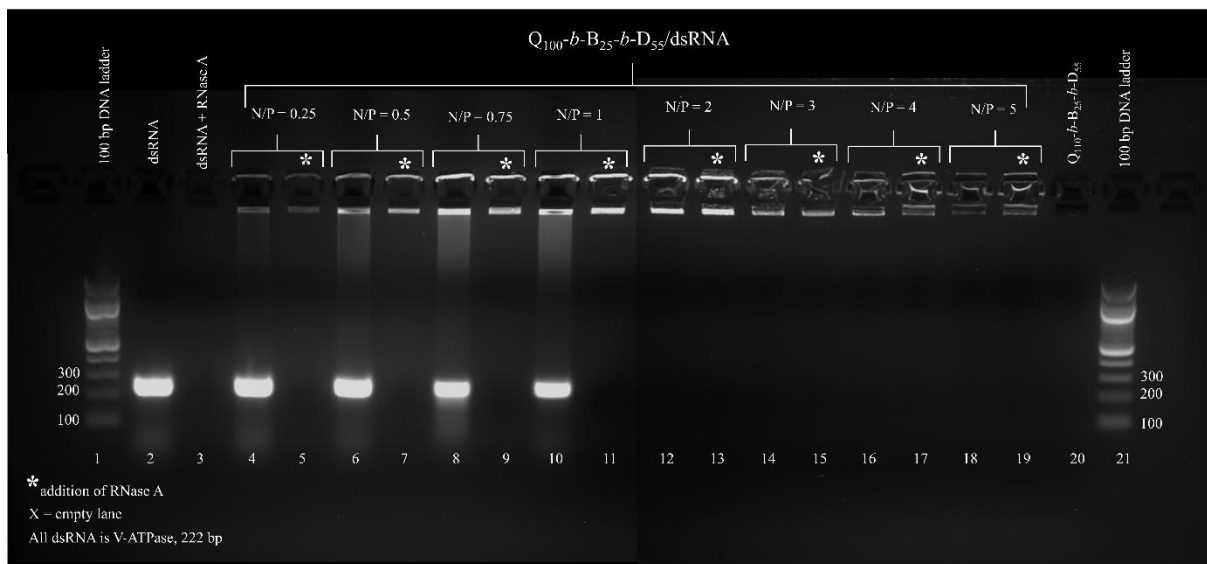

Figure S5.  $Q_{100}\text{-}b\text{-}B_{25}\text{-}b\text{-}D_{55}/\text{dsRNA}$  agarose gel, varying N/P ratio from 0.25 – 5. For comparison, dsRNA has been run, as well as a 100 bp DNA ladder. \* = addition of RNase A.

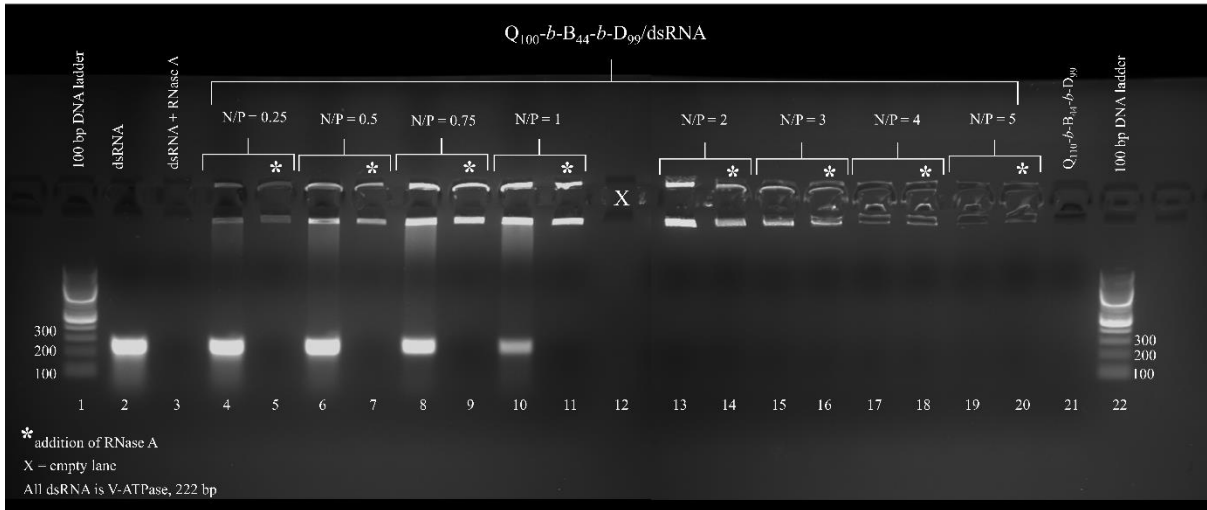

Figure S6.  $Q_{100}$ -*b*- $B_{44}$ -*b*- $D_{99}$ /dsRNA agarose gel, varying N/P ratio from 0.25 – 5. For comparison, dsRNA has been run, as well as a 100 bp DNA ladder. \* = addition of RNase A.

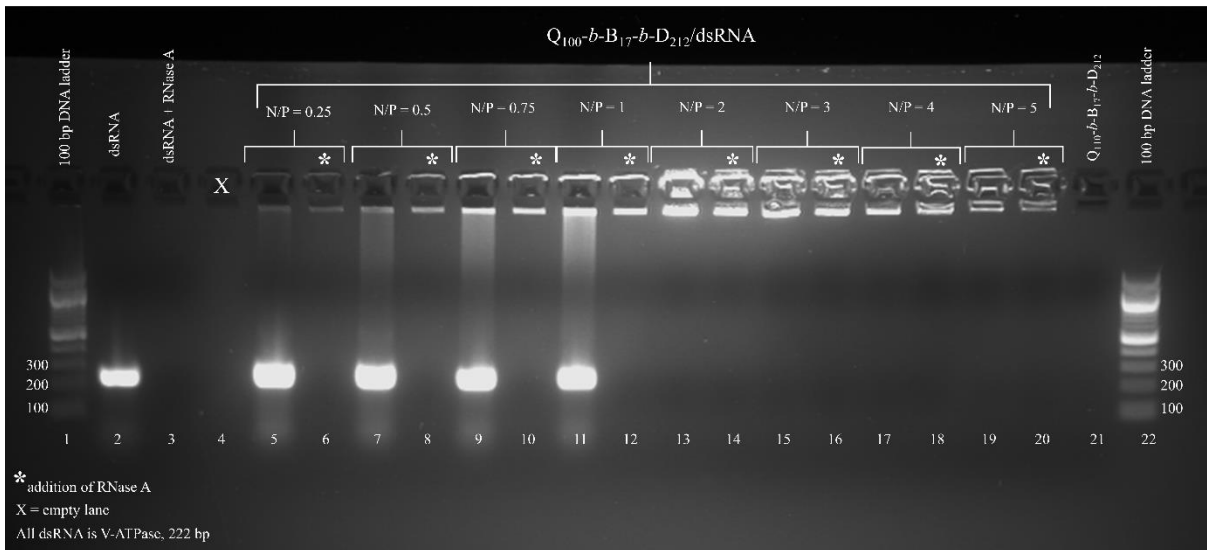

Figure S7.  $Q_{100}$ -*b*- $B_{17}$ -*b*- $D_{212}$ /dsRNA agarose gel, varying N/P ratio from 0.25 – 5. For comparison, dsRNA has been run, as well as a 100 bp DNA ladder. \* = addition of RNase A.
